# Supplementary material for: A Retrospective Analysis of Disease Epidemiology, Comorbidity Burden, Treatment Patterns, and Healthcare Resource Utilization of Migraine in the United Arab Emirates
Source: PubMed Central journal article supplement — Pain Ther. 2024 Jul 19;13(5):1235–55. doi: 10.1007/s40122-024-00634-1 (PMC11393247; doi:10.1007/s40122-024-00634-1), 2024-07-19
Supplement: 40122_2024_634_MOESM1_ESM.pdf [file 40122_2024_634_MOESM1_ESM.pdf]

# **A Retrospective Analysis of Disease Epidemiology, Comorbidity Burden, Treatment Patterns, and Healthcare Resource Utilization of Migraine in United Arab Emirates**

## **Authors details:**

Alessandro Terruzzi, Neurology Department, Mediclinic City Hospital, Dubai, UAE

Abubaker AlMadani, Department of Neurology, Rashid Hospital, Dubai, UAE

Suhail Al-Rukn, Department of Neurology, Rashid Hospital, Dubai, UAE

Mohamed Farghaly, Health Economics & Insurance Policies Department, Dubai Health Authority, Dubai, UAE

Sara A Dallal, Dubai Health Authority, Dubai, UAE

Mostafa WA Zayed, Health Economics & Outcomes Research (HEOR) Lead, Pfizer, Dubai, UAE

Nora Vainstein, Cardiovascular Scientific Expert Emerging Market, Pfizer, Dubai, UAE

Mohamed Fathy, Regional Internal Medicine Medical Lead, Pfizer, Dubai, UAE

Anup Uboweja, Consulting Svcs, Real-World Evidence, IQVIA, Dubai, UAE

Ashok Natarajan, Consulting Services, IQVIA, London, UK

Subramanyam Kumaresan, EMEA Consulting Services, , IQVIA, Bangalore, India

Badrinath C Ramachandrachar, Real-World Evidence, IQVIA, Dubai, UAE

Ali Aljabban MD, Senior Medical Manager, Pfizer, Dubai, UAE

## **Correspondence details:**

Name: Ali Aljabban

Address: Senior Medical Manager, Pfizer Building, Dubai Media City, P.O Box 502749, Dubai, UAE; Email: [ali.aljabban@pfizer.com](mailto:ali.aljabban@pfizer.com)

## SUPPLEMENTARY MATERIAL

### TABLES

**Table S1** ICD-10-CM codes for migraine.

| <b>Diagnosis Code</b> | <b>Diagnosis Name</b>                                        |
|-----------------------|--------------------------------------------------------------|
| G43.001               | Migraine w/o aura, not intractable, with status migrainosus  |
| G43.009               | Migraine w/o aura, not intractable, w/o status migrainosus   |
| G43.011               | Migraine without aura, intractable, with status migrainosus  |
| G43.019               | Migraine w/o aura, intractable, without status migrainosus   |
| G43.101               | Migraine with aura, not intractable, with status migrainosus |
| G43.109               | Migraine with aura, not intractable, w/o status migrainosus  |
| G43.111               | Migraine with aura, intractable, with status migrainosus     |
| G43.119               | Migraine with aura, intractable, without status migrainosus  |
| G43.501               | Perst migraine aura w/o cereb infrc, not ntrct, w stat migr  |
| G43.509               | Perst migrn aura w/o cereb infrc, not ntrct, w/o stat migr   |
| G43.511               | Perst migraine aura w/o cerebral infrc, ntrct, w stat migr   |
| G43.519               | Perst migraine aura w/o cerebral infrc, ntrct, w/o stat migr |
| G43.601               | Perst migraine aura w cerebral infrc, not ntrct, w stat migr |
| G43.609               | Perst migraine aura w cereb infrc, not ntrct, w/o stat migr  |
| G43.611               | Perst migraine aura w cerebral infrc, ntrct, w stat migr     |
| G43.619               | Perst migraine aura w cerebral infrc, ntrct, w/o stat migr   |
| G43.701               | Chronic migraine w/o aura, not intractable, w stat migr      |
| G43.709               | Chronic migraine w/o aura, not intractable, w/o stat migr    |
| G43.711               | Chronic migraine w/o aura, intractable, w status migrainosus |
| G43.719               | Chronic migraine w/o aura, intractable, w/o stat migr        |
| G43.801               | Other migraine, not intractable, with status migrainosus     |
| G43.809               | Other migraine, not intractable, without status migrainosus  |
| G43.811               | Other migraine, intractable, with status migrainosus         |
| G43.819               | Other migraine, intractable, without status migrainosus      |
| G43.901               | Migraine, unsp, not intractable, with status migrainosus     |
| G43.909               | Migraine, unsp, not intractable, without status migrainosus  |
| G43.911               | Migraine, unspecified, intractable, with status migrainosus  |
| G43.919               | Migraine, unsp, intractable, without status migrainosus      |

Abbreviations: ICD-10-CM, International Classification of Diseases, Tenth Revision, Clinical Modification; unsp, unspecified; w/o, without.

**Table S2** List of -preventive and acute medications.

| <b>Preventive medications</b> |                                                                                                                                                                                         |
|-------------------------------|-----------------------------------------------------------------------------------------------------------------------------------------------------------------------------------------|
| 1                             | Beta blockers: Metoprolol, Bisoprolol, Propranolol, timolol                                                                                                                             |
| 2                             | ACE's and ARAs: ARAs 'sartans', Lisinopril                                                                                                                                              |
| 3                             | Antidepressants: Amitriptyline, Opipramol, Tricyclics, SSRIs, SNRIs, Venlafaxine, amitriptyline                                                                                         |
| 4                             | Anticonvulsants: Topiramate, Valproic acid                                                                                                                                              |
| 5                             | Muscle relaxants: Onabotulinum toxin                                                                                                                                                    |
| 6                             | Calcium channel blockers: Verapamil, Flunarizine                                                                                                                                        |
| 7                             | Magnesium compounds: Valproic acid, Candesartan, Bisoprolol, Onabotulinum toxin, Topiramate, Metoprolol, ARAs 'sartans', Amitriptyline, Propranolol, Opipramol, Flunarizine, Lisinopril |
| 8                             | Erenumab (Aimovig)                                                                                                                                                                      |
| 9                             | EMGALITY Galcanezumab (Emgality)                                                                                                                                                        |
| 10                            | Eptinezumab (Vyepi)                                                                                                                                                                     |
| 11                            | Antiepileptics: Topiramate, Valproate, Divalproex                                                                                                                                       |
| 12                            | Anti-Convulsants: Topiramate, Valporic Acid, Divalproex Sodium                                                                                                                          |
| <b>Acute medications</b>      |                                                                                                                                                                                         |
| 1                             | Anti-emetics: Metoclopramide                                                                                                                                                            |
| 2                             | Analgesics/non-steroidal anti-inflammatory drugs: Ibuprofen, Metamizole, Opioids, Diclofenac, Cyclooxygenase-2 inhibitors ('coxibs') 2, Naproxen                                        |
| 3                             | Selective serotonin (5-HT1) agonists (triptans): Sumatriptand, Rizatriptan, Zolmitriptane (all administration routes)                                                                   |
| 4                             | Emergency medication: Dexamethasone, Prednisone, Sumatriptan (subcutaneous), Metamizole (intravenous), Acetylsalicylic acid (intravenous)                                               |
| 5                             | Ergots                                                                                                                                                                                  |
| 6                             | Hyponotic: Alprazolam                                                                                                                                                                   |
| 7                             | Stimulants: Caffeine, Aspirin, Codeine                                                                                                                                                  |
| 8                             | Lasmitidan (Reyvow)                                                                                                                                                                     |

**Table S3** Summary of migraine patients identified from DRWD (attrition table).

| Criteria                                                                                                                                                                                                                                                                                                                                                                              | Number of patients |                 |
|---------------------------------------------------------------------------------------------------------------------------------------------------------------------------------------------------------------------------------------------------------------------------------------------------------------------------------------------------------------------------------------|--------------------|-----------------|
|                                                                                                                                                                                                                                                                                                                                                                                       | Included           | Excluded        |
|                                                                                                                                                                                                                                                                                                                                                                                       | N (%)              | N (%)           |
| <b>Inclusion criteria (The study period: 01 January 2014 to 31 March 2022)</b>                                                                                                                                                                                                                                                                                                        |                    |                 |
| Patient with at least 1 diagnosis claim (principal, secondary and admitted) for migraine diagnosis (as per ICD-10-CM codes) anytime during the study period                                                                                                                                                                                                                           | 451,983 (100.0%)   | -               |
| Patients with age $\geq$ 18 years (based on demographic data availability and no claim for pediatric visits if patient age is missing)                                                                                                                                                                                                                                                | 430,544 (95.3%)    | 21,439 (4.7%)   |
| Patient with first diagnosis claim (principal, secondary and admitted) for migraine diagnosis (as per ICD-10-CM codes) anytime during the index period                                                                                                                                                                                                                                | 340,015 (79.0%)    | 90,529 (21.0%)  |
| <b>Continuous enrolment:</b> Patient with at least 1 claim (migraine/non-migraine), anytime during the 12 months of pre-index period and 12 months of post-index (follow-up) period                                                                                                                                                                                                   | 203,222 (59.8%)    | 136,793 (40.2%) |
| <b>Treatment cohorts</b>                                                                                                                                                                                                                                                                                                                                                              |                    |                 |
| <b>1.Preventive migraine:</b> Patients with a diagnosis code for migraine and those who were prescribed any preventive medicines alone in the journey.                                                                                                                                                                                                                                | 8,308 (4.1%)       | -               |
| <b>2.Acute migraine:</b> Patients with a diagnosis code for migraine and those who were prescribed any acute medicines alone in the journey.                                                                                                                                                                                                                                          | 105,158 (51.7%)    | -               |
| <b>3.Preventive + acute migraine:</b> Patients with a diagnosis code for migraine and those who were prescribed any acute medicines and preventive medicine in the journey.                                                                                                                                                                                                           | 30,314 (14.9%)     | -               |
| <b>4. Non-pharmacological:</b> Patients with a diagnosis of migraine who did not take acute or preventive migraine medications but were instead undergoing migraine related non-pharmacological interventions (Electric Stimulation Therapy, Electrical Stimulation, Acupunct W/O Stimul 15 Min, Acupunct W/O Stimul Addl 15M, Acupunct W/Stimul 15 Min, Acupunct W/Stimul Addl 15M). | 98 (0.05%)         | -               |
| <b>5. Others:</b> Patients who have a migraine related claim but did not have any related treatment defined in the medication list                                                                                                                                                                                                                                                    | 59,344 (29.2%)     | -               |

Abbreviations: Acupunct, Acupuncture; Addl, Additional; DRWD, Dubai Real-World Database; ICD-10-CM, International Classification of Diseases, Tenth Revision, Clinical Modification; w/o, without.

**Table S4** ICD-10 codes for Quan Charlson comorbidity index.

| <b>Disease</b>              | <b>ICD-10 Code</b>                                                              | <b>Score</b> |
|-----------------------------|---------------------------------------------------------------------------------|--------------|
| Myocardial Infarction       | I22-I23, I25.2                                                                  | 1            |
| Congestive Heart Failure    | I11, I13, I25.5, I42-43, I50, I51.7                                             | 1            |
| Peripheral Vascular Disease | I70-I73, I77.0, I77.1, K55.1, K55.8-55.9, R02, Z95.8-95.9                       | 1            |
| Cerebrovascular Disease     | G45-G46, I60-I69                                                                | 1            |
| Dementia                    | A81.0, F00-F03; F05.1; G30-G31                                                  | 1            |
| Chronic Pulmonary Disease   | I26-27, J40-J47; J60-J67; J68.4; J70.1; J70.3;                                  | 1            |
| Rheumatic disease           | M05-06, M09, M12.0, M31.5, M32-M36                                              | 1            |
| Liver Disease               | B18, I85, I86.4, I98.2, K70-71, K72.1, K72.9, K76, R16.2, Z94.4                 | 1            |
| Diabetes Mellitus           | E10-14                                                                          | 1            |
| Hemiplegia or paraplegia    | G11.4, G81-83                                                                   | 2            |
| Renal Disease               | I12-13, N01, N03, N05, N07, N08, N17.1, N17.2, N18, N19, N25, Z49, Z94.0, Z99.2 | 2            |
| Malignancy                  | C00-26, C30-34, C37-41, C43, C45-58, C60-76, C80-85, C88, C90-97                | 2            |
| Metastatic Tumor            | C77-C79                                                                         | 6            |
| AIDS/ HIV                   | B20-B24                                                                         | 6            |

Abbreviations: AIDS, Acquired immunodeficiency syndrome; HIV, Human immunodeficiency virus; ICD-10, International Classification of Diseases, Tenth Revision.

**Table S5** Cardiovascular Comorbidities in the study period in the overall and cohort population (sub-cohort 1: Preventive, sub-cohort 2: Acute, sub-cohort 3: Preventive + Acute).

|                                                                 | Overall                   |                                                         | Sub-cohort 1              |                                                            | Sub-cohort 2              |                                                       | Sub-cohort 3              |                                                                    |
|-----------------------------------------------------------------|---------------------------|---------------------------------------------------------|---------------------------|------------------------------------------------------------|---------------------------|-------------------------------------------------------|---------------------------|--------------------------------------------------------------------|
|                                                                 | N                         | %                                                       | N                         | %                                                          | N                         | %                                                     | N                         | %                                                                  |
| <b>Overall Study population in the index period</b>             | 203,222                   | 100.0                                                   | 8,304                     | 4.1                                                        | 105,158                   | 51.7                                                  | 30,314                    | 14.9                                                               |
| Patients with Cardiovascular Disease in the entire study period | 27,148                    | 13.4                                                    | 1,835                     | 22.1                                                       | 11,761                    | 11.2                                                  | 5,613                     | 18.5                                                               |
| <b>Cardiovascular Comorbidities</b>                             | <b>Number of Patients</b> | <b>Percentage of Patients by Overall patient sample</b> | <b>Number of Patients</b> | <b>Percentage of Patients by Preventive patient sample</b> | <b>Number of Patients</b> | <b>Percentage of Patients by Acute patient sample</b> | <b>Number of Patients</b> | <b>Percentage of Patients by Preventive + Acute patient sample</b> |
| Myocardial ischemia/infarction                                  | 12,498                    | 6.1                                                     | 819                       | 9.9                                                        | 5,752                     | 5.5                                                   | 2,264                     | 7.5                                                                |
| Cerebrovascular disease                                         | 8,463                     | 4.2                                                     | 746                       | 9.0                                                        | 2,924                     | 2.8                                                   | 2,288                     | 7.5                                                                |
| Peripheral vascular disease                                     | 5,059                     | 2.5                                                     | 285                       | 3.4                                                        | 2,360                     | 2.2                                                   | 994                       | 3.3                                                                |
| Arrhythmias                                                     | 3,498                     | 1.7                                                     | 273                       | 3.3                                                        | 1,507                     | 1.4                                                   | 689                       | 2.3                                                                |
| Venous thromboembolism                                          | 1,414                     | 0.7                                                     | 83                        | 1.0                                                        | 630                       | 0.6                                                   | 298                       | 1.0                                                                |
| Congestive heart failure                                        | 2,671                     | 1.3                                                     | 221                       | 2.7                                                        | 1,173                     | 1.1                                                   | 481                       | 1.6                                                                |
| Pulmonary embolism                                              | 584                       | 0.3                                                     | 34                        | 0.4                                                        | 260                       | 0.2                                                   | 138                       | 0.5                                                                |
| Hypertension*                                                   | 72                        | 0.0                                                     | 1                         | 0.0                                                        | 42                        | 0.0                                                   | 10                        | 0.0                                                                |
| Intestinal ischemia                                             | 30                        | 0.0                                                     | 2                         | 0.0                                                        | 12                        | 0.0                                                   | 5                         | 0.0                                                                |

Note: Patients are not mutually exclusive, patients might have more than one cardiovascular comorbidity.

\*In the current study, only a subset of patients with uncontrolled hypertension (hypertensive crisis, hypertensive emergency etc) is considered for analysis; therefore, the data provided here does not represent the entire burden of hypertension in the study population.

**Table S6** Cardiovascular comorbidity attrition.

| <b>Cardiovascular Comorbidity</b> | <b>Number of Migraine patients with Cardiovascular Comorbidity in the study period</b> | <b>Number of patients in Preventive, Acute, Preventive + Acute cohorts</b> | <b>Number of patients in the index period</b> | <b>Number of patients meet the Continuous enrollment</b> |
|-----------------------------------|----------------------------------------------------------------------------------------|----------------------------------------------------------------------------|-----------------------------------------------|----------------------------------------------------------|
| Myocardial ischemia/infarction    | 12,498                                                                                 | 5,892                                                                      | 5,339                                         | 5,024                                                    |
| Cerebrovascular disease           | 8,463                                                                                  | 4,624                                                                      | 4,329                                         | 4,125                                                    |
| Peripheral vascular disease       | 5,059                                                                                  | 2,435                                                                      | 2,105                                         | 1,989                                                    |
| Arrhythmias                       | 3,498                                                                                  | 1,678                                                                      | 1,470                                         | 1,404                                                    |
| Congestive heart failure          | 2,671                                                                                  | 1,240                                                                      | 1,102                                         | 1,045                                                    |
| Venous thromboembolism            | 1,414                                                                                  | 692                                                                        | 587                                           | 560                                                      |
| Pulmonary embolism                | 584                                                                                    | 325                                                                        | 258                                           | 244                                                      |
| Hypertension                      | 72                                                                                     | 51                                                                         | 23                                            | 23                                                       |
| Intestinal ischemia               | 30                                                                                     | 12                                                                         | 10                                            | 9                                                        |

**Table S7** Overall healthcare resource utilization and costs by cohort without encounter and activity breakup (12 months post-index period including index date).

| Analysis of Claims for overall and cohort population |                         |                  |                               |                         |                  |                               |                         |                  |                               |                         |                  |                               |
|------------------------------------------------------|-------------------------|------------------|-------------------------------|-------------------------|------------------|-------------------------------|-------------------------|------------------|-------------------------------|-------------------------|------------------|-------------------------------|
|                                                      | Overall                 |                  |                               | Preventive              |                  |                               | Acute                   |                  |                               | Preventive + Acute      |                  |                               |
| <b>Number of patients in the index Period</b>        | 143,780                 |                  |                               | 8,308<br>(4.1%)         |                  |                               | 105,158<br>(51.7%)      |                  |                               | 30,314<br>(14.9%)       |                  |                               |
|                                                      | <b>Disease specific</b> | <b>All Cause</b> | <b>Average disease burden</b> | <b>Disease specific</b> | <b>All Cause</b> | <b>Average disease burden</b> | <b>Disease specific</b> | <b>All Cause</b> | <b>Average disease burden</b> | <b>Disease specific</b> | <b>All Cause</b> | <b>Average disease burden</b> |
| <b>N (Patient Counts)</b>                            | 143,690                 | 143,766          |                               | 8,307                   | 8,308            |                               | 105,073                 | 105,145          |                               | 30,310                  | 30,313           |                               |
| <b>Total</b>                                         | 423,037                 | 2,046,483        |                               | 23,632                  | 127,945          |                               | 257,262                 | 1,371,123        |                               | 142,143                 | 547,415          |                               |
| <b>Mean</b>                                          | 2.9                     | 14.2             | 20.7%                         | 2.8                     | 15.4             | 18.5%                         | 2.4                     | 13.0             | 18.8%                         | 4.7                     | 18.1             | 26.0%                         |
| <b>Median</b>                                        | 2.0                     | 10.0             |                               | 2.0                     | 11.0             |                               | 2.0                     | 9.0              |                               | 3.0                     | 13.0             |                               |
| <b>Std</b>                                           | 2.8                     | 13.1             |                               | 2.6                     | 13.7             |                               | 1.9                     | 11.8             |                               | 4.4                     | 16.1             |                               |
| <b>Min</b>                                           | 1.0                     | 1.0              |                               | 1.0                     | 1.0              |                               | 1.0                     | 1.0              |                               | 1.0                     | 1.0              |                               |
| <b>Max</b>                                           | 71.0                    | 323.0            |                               | 36.0                    | 180.0            |                               | 41.0                    | 323.0            |                               | 71.0                    | 309.0            |                               |
| Gross Cost (USD) for overall and cohort population   |                         |                  |                               |                         |                  |                               |                         |                  |                               |                         |                  |                               |
|                                                      | Overall                 |                  |                               | Preventive              |                  |                               | Acute                   |                  |                               | Preventive + Acute      |                  |                               |
| <b>Total</b>                                         | 91,601,057.4            | 460,840,115.8    | 19.9%                         | 5,289,712.9             | 32,735,298.1     | 16.2%                         | 47,922,449.8            | 287,509,470.8    | 16.7%                         | 38,388,895.2            | 140,595,346.9    | 27.3%                         |
| <b>Mean</b>                                          | 637.3                   | 3,205.3          |                               | 636.8                   | 3,940.2          |                               | 456.0                   | 2,734.4          |                               | 1,266.5                 | 4,638.3          |                               |
| <b>Median</b>                                        | 198.1                   | 1,252.6          |                               | 181.3                   | 1,693.3          |                               | 158.9                   | 1,039.7          |                               | 424.9                   | 2,030.6          |                               |
| <b>Std</b>                                           | 1,992.8                 | 7,599.5          |                               | 1,536.4                 | 8,019.6          |                               | 1,500.5                 | 6,878.9          |                               | 3,141.1                 | 9,443.5          |                               |
| <b>Min</b>                                           | 0.0                     | 2.4              |                               | 0.0                     | 2.9              |                               | 0.0                     | 2.4              |                               | 1.4                     | 8.6              |                               |
| <b>Max</b>                                           | 168,903.3               | 564,740.7        |                               | 37,210.0                | 182,907.7        |                               | 143,753.1               | 539,190.0        |                               | 168,903.3               | 564,740.7        |                               |

Abbreviations: USD, United States Dollars.

Note: Excluded the patients/claims having claim amount less than equal to 0 USD by each cohort.



Gross Cost = Insurance Paid Amount + Patient Share

Implied PPP conversion rate (National currency per international dollar): <https://www.imf.org/external/datamapper/PPPEX@WEO/OEMDC/ARE>

**Table S8** Overall healthcare resource utilization and cost by cardiovascular comorbidity

| Comorbidity                    | Number of claims |        |      |        |     |     |      | Gross Cost (USD) |             |         |         |          |      |           |
|--------------------------------|------------------|--------|------|--------|-----|-----|------|------------------|-------------|---------|---------|----------|------|-----------|
|                                | Disease specific |        |      |        |     |     |      | Disease specific |             |         |         |          |      |           |
|                                | N                | Total  | Mean | Median | Std | Min | Max  | N                | Total       | Mean    | Median  | Std      | Min  | Max       |
| Myocardial ischemia/infarction | 5,012            | 14,994 | 3.0  | 2.0    | 3.5 | 1.0 | 78.0 | 5,012            | 9,220,442.1 | 1,839.7 | 478.5   | 6,027.3  | 1.4  | 161,878.5 |
| Cerebrovascular disease        | 4,119            | 12,418 | 3.0  | 2.0    | 3.9 | 1.0 | 84.0 | 4,119            | 6,944,034.9 | 1,685.6 | 647.8   | 8,208.6  | 1.0  | 356,042.1 |
| Peripheral vascular disease    | 1,985            | 6,068  | 3.1  | 2.0    | 3.0 | 1.0 | 25.0 | 1,985            | 4,806,219.6 | 2,421.1 | 577.0   | 5,860.8  | 2.4  | 102,354.5 |
| Arrhythmias                    | 1,404            | 4,016  | 2.9  | 2.0    | 3.2 | 1.0 | 35.0 | 1,404            | 2,871,071.3 | 2,045.0 | 536.4   | 8,863.2  | 2.4  | 176,428.7 |
| Congestive heart failure       | 1,044            | 2,974  | 2.8  | 2.0    | 3.7 | 1.0 | 42.0 | 1,044            | 2,081,622.5 | 1,993.8 | 582.3   | 5,566.5  | 2.9  | 107,123.9 |
| Venous thromboembolism         | 560              | 1,717  | 3.1  | 2.0    | 3.3 | 1.0 | 26.0 | 560              | 1,051,127.3 | 1,877.0 | 644.0   | 6,033.5  | 6.2  | 97,620.6  |
| Pulmonary embolism             | 243              | 862    | 3.5  | 2.0    | 4.1 | 1.0 | 22.0 | 243              | 969,259.8   | 3,988.5 | 1,039.2 | 12,606.7 | 8.6  | 126,246.9 |
| Hypertension                   | 23               | 41     | 1.8  | 1.0    | 1.3 | 1.0 | 6.0  | 23               | 23,997.6    | 1,043.5 | 166.5   | 1,633.5  | 4.3  | 5,878.5   |
| Intestinal ischemia            | 9                | 11     | 1.2  | 1.0    | 0.4 | 1.0 | 2.0  | 9                | 28,618.2    | 3,179.9 | 1,175.6 | 4,169.4  | 43.1 | 12,613.9  |

Abbreviations: Max, maximum; Min, minimum; Std, standard deviation; USD, United States Dollars.

Implied PPP conversion rate (National currency per international dollar): <https://www.imf.org/external/datamapper/PPPEX@WEO/OEMDC/ARE>

**Table S9** Healthcare resource utilization and costs by visit type for cardiovascular comorbidity.

| Comorbidity                     | Number of claims   |        |      |        |     |     |      | Gross Cost (USD) |             |          |         |          |         |           |
|---------------------------------|--------------------|--------|------|--------|-----|-----|------|------------------|-------------|----------|---------|----------|---------|-----------|
|                                 | Disease specific   |        |      |        |     |     |      | Disease specific |             |          |         |          |         |           |
|                                 | <i>In-patients</i> |        |      |        |     |     |      |                  |             |          |         |          |         |           |
|                                 | N                  | Total  | Mean | Median | Std | Min | Max  | N                | Total       | Mean     | Median  | Std      | Min     | Max       |
| Myocardial ischemia/ infarction | 284                | 327    | 1.2  | 1.0    | 0.5 | 1.0 | 4.0  | 284              | 4,141,098.1 | 14,581.3 | 7,355.0 | 18,762.7 | 416.7   | 161,878.5 |
| Cerebrovascular disease         | 176                | 205    | 1.2  | 1.0    | 0.5 | 1.0 | 4.0  | 176              | 2,634,829.7 | 14,970.8 | 6,011.0 | 35,051.2 | 461.7   | 356,042.1 |
| Peripheral vascular disease     | 91                 | 100    | 1.1  | 1.0    | 0.3 | 1.0 | 3.0  | 91               | 1,467,363.2 | 16,124.9 | 6,870.8 | 29,312.0 | 229.7   | 171,206.7 |
| Arrhythmias                     | 81                 | 103    | 1.3  | 1.0    | 0.9 | 1.0 | 8.0  | 81               | 1,037,834.9 | 12,812.9 | 9,698.6 | 13,203.8 | 1,300.0 | 89,921.5  |
| Congestive heart failure        | 80                 | 97     | 1.2  | 1.0    | 0.9 | 1.0 | 8.0  | 80               | 1,118,016.3 | 13,975.1 | 9,148.3 | 16,109.1 | 1,369.4 | 102,176.6 |
| Venous thromboembolism          | 35                 | 39     | 1.1  | 1.0    | 0.3 | 1.0 | 2.0  | 35               | 428,765.1   | 12,250.2 | 5,460.3 | 19,498.1 | 1,701.4 | 95,175.6  |
| Pulmonary embolism              | 27                 | 31     | 1.1  | 1.0    | 0.5 | 1.0 | 3.0  | 27               | 570,386.6   | 21,125.4 | 8,505.7 | 31,944.0 | 2,190.4 | 126,246.9 |
| Hypertension                    | 4                  | 4      | 1.0  | 1.0    | 0.0 | 1.0 | 1.0  | 4                | 17,047.4    | 4,261.7  | 3,802.4 | 1,094.7  | 3,564.1 | 5,878.5   |
| Intestinal ischemia             | 3                  | 3      | 1.0  | 1.0    | 0.0 | 1.0 | 1.0  | 3                | 22,391.4    | 7,463.6  | 5,507.2 | 3,590.9  | 5,276.1 | 11,608.1  |
| <i>Out-patients</i>             |                    |        |      |        |     |     |      |                  |             |          |         |          |         |           |
| Myocardial ischemia/ infarction | 4,836              | 14,295 | 3.0  | 2.0    | 3.4 | 1.0 | 78.0 | 4,836            | 4,937,584.7 | 1,021.1  | 429.2   | 1,767.5  | 1.4     | 35,444.0  |
| Cerebrovascular disease         | 3,897              | 11,819 | 3.0  | 2.0    | 3.9 | 1.0 | 80.0 | 3,897            | 4,093,684.7 | 1,050.2  | 567.0   | 1,668.4  | 1.0     | 34,823.9  |
| Peripheral vascular disease     | 1,329              | 3,828  | 2.9  | 2.0    | 3.2 | 1.0 | 34.0 | 1,329            | 1,356,892.3 | 1,021.1  | 473.7   | 1,736.8  | 2.4     | 21,276.1  |
| Arrhythmias                     | 977                | 2,830  | 2.9  | 2.0    | 3.7 | 1.0 | 41.0 | 977              | 1,014,141.1 | 1,037.8  | 515.8   | 1,599.5  | 2.9     | 17,202.4  |
| Congestive heart failure        | 1,958              | 5,941  | 3.0  | 2.0    | 3.0 | 1.0 | 24.0 | 1,958            | 3,682,185.6 | 1,880.4  | 554.1   | 4,002.4  | 2.4     | 34,998.1  |
| Venous thromboembolism          | 526                | 1,585  | 3.0  | 2.0    | 3.3 | 1.0 | 25.0 | 526              | 563,921.1   | 1,072.2  | 570.3   | 1,809.1  | 4.8     | 19,845.9  |
| Pulmonary embolism              | 201                | 743    | 3.7  | 2.0    | 4.2 | 1.0 | 21.0 | 201              | 336,377.0   | 1,673.7  | 804.8   | 2,118.2  | 8.6     | 9,903.3   |

|                                |     |     |     |     |      |     |      |     |           |         |       |         |       |         |
|--------------------------------|-----|-----|-----|-----|------|-----|------|-----|-----------|---------|-------|---------|-------|---------|
| Hypertension                   | 16  | 34  | 2.1 | 1.5 | 1.5  | 1.0 | 6.00 | 16  | 5,872.7   | 367.0   | 123.4 | 563.6   | 4.3   | 2,045.5 |
| Intestinal ischemia            | 7   | 8   | 1.1 | 1.0 | 0.4  | 1.0 | 2.00 | 7   | 6,226.8   | 889.5   | 385.6 | 1,173.7 | 43.1  | 3,349.3 |
| <b>Emergency Room Visit</b>    |     |     |     |     |      |     |      |     |           |         |       |         |       |         |
| Myocardial ischemia/infarction | 211 | 372 | 1.8 | 1.0 | 1.4  | 1.0 | 9.0  | 211 | 141,759.3 | 671.8   | 478.5 | 659.8   | 33.5  | 4,199.5 |
| Cerebrovascular disease        | 268 | 394 | 1.5 | 1.0 | 1.0  | 1.0 | 9.0  | 268 | 215,520.6 | 804.3   | 727.8 | 593.8   | 5.3   | 5,027.3 |
| Peripheral vascular disease    | 63  | 88  | 1.4 | 1.0 | 1.0  | 1.0 | 6.0  | 63  | 46,815.3  | 743.1   | 695.7 | 434.4   | 57.4  | 1,838.3 |
| Arrhythmias                    | 28  | 41  | 1.5 | 1.0 | 0.7  | 1.0 | 4.0  | 28  | 29,646.9  | 1,058.9 | 701.4 | 978.9   | 148.8 | 4,611.0 |
| Congestive heart failure       | 18  | 30  | 1.7 | 1.0 | 0.9  | 1.0 | 4.0  | 18  | 6,018.2   | 334.4   | 241.1 | 345.0   | 19.1  | 1,475.1 |
| Venous thromboembolism         | 60  | 93  | 1.6 | 1.0 | 1.2  | 1.0 | 7.0  | 60  | 58,441.1  | 974.2   | 747.8 | 1,002.4 | 14.4  | 4,915.8 |
| Pulmonary embolism             | 46  | 88  | 1.9 | 1.0 | 1.3  | 1.0 | 7.0  | 46  | 62,496.2  | 1,358.4 | 848.8 | 1,351.7 | 130.1 | 6,701.0 |
| Hypertension                   | 3   | 3   | 1.0 | 1.0 | 0.00 | 1.0 | 1.0  | 3   | 1,078.0   | 359.3   | 232.5 | 299.0   | 144.0 | 701.0   |
| Intestinal ischemia            | -   | -   | -   | -   | -    | -   | -    | -   | -         | -       | -     | -       | -     | -       |

Abbreviations: USD, United States Dollars.

Gross Cost = Insurance Paid Amount + Patient Share

Note: Excluded the claims having claim amount less than equal to 0 USD

Implied PPP conversion rate (National currency per international dollar): <https://www.imf.org/external/datamapper/PPPEX@WEO/OEMDC/ARE>

**Table S10** Healthcare resource utilization and costs by activity type for cardiovascular comorbidity.

| Comorbidity                     | Number of claims   |       |      |        |     |     |      | Net Cost (USD)   |             |         |        |         |      |          |
|---------------------------------|--------------------|-------|------|--------|-----|-----|------|------------------|-------------|---------|--------|---------|------|----------|
|                                 | Disease specific   |       |      |        |     |     |      | Disease specific |             |         |        |         |      |          |
|                                 | <i>Medications</i> |       |      |        |     |     |      |                  |             |         |        |         |      |          |
|                                 | N                  | Total | Mean | Median | Std | Min | Max  | N                | Total       | Mean    | Median | Std     | Min  | Max      |
| Myocardial ischemia/ infarction | 3,308              | 6,820 | 2.1  | 1.0    | 2.2 | 1.0 | 71.0 | 3,308            | 2,551,312.4 | 771.3   | 221.1  | 1,527.3 | 0.5  | 23,538.3 |
| Cerebrovascular disease         | 2,689              | 5,027 | 1.9  | 1.0    | 2.3 | 1.0 | 57.0 | 2,689            | 939,051.2   | 349.3   | 80.9   | 1,036.8 | 0.0  | 29,120.6 |
| Peripheral vascular disease     | 1,197              | 2,059 | 1.7  | 1.0    | 1.5 | 1.0 | 18.0 | 1,197            | 486,329.7   | 406.2   | 123.0  | 1,157.9 | 1.4  | 25,073.7 |
| Arrhythmias                     | 784                | 1,490 | 1.9  | 1.0    | 1.8 | 1.0 | 13.0 | 784              | 425,593.8   | 543.1   | 101.4  | 1,442.6 | 0.5  | 14,821.1 |
| Congestive heart failure        | 612                | 1,276 | 2.1  | 1.0    | 2.4 | 1.0 | 27.0 | 612              | 453,564.6   | 741.1   | 262.2  | 1,381.3 | 0.5  | 14,233.5 |
| Venous thromboembolism          | 372                | 758   | 2.0  | 1.0    | 1.8 | 1.0 | 14.0 | 372              | 266,648.8   | 716.7   | 218.2  | 1,950.2 | 2.4  | 19,845.9 |
| Pulmonary embolism              | 154                | 320   | 2.1  | 1.0    | 1.8 | 1.0 | 8.0  | 154              | 126,126.8   | 819.1   | 194.3  | 2,522.5 | 3.8  | 29,651.7 |
| Hypertension                    | 16                 | 20    | 1.3  | 1.0    | 0.4 | 1.0 | 2.0  | 16               | 2,356.5     | 147.4   | 33.0   | 297.1   | 3.3  | 1,205.7  |
| Intestinal ischemia             | 7                  | 7     | 1.0  | 1.0    | 0.0 | 1.0 | 1.0  | 7                | 3,790.9     | 541.6   | 233.0  | 589.5   | 40.7 | 1,381.3  |
| <i>Procedures</i>               |                    |       |      |        |     |     |      |                  |             |         |        |         |      |          |
| Myocardial ischemia/ infarction | 3,688              | 6,731 | 1.8  | 1.0    | 1.7 | 1.0 | 50.0 | 3,688            | 3,601,634.0 | 976.6   | 301.9  | 2,749.3 | 3.8  | 56,941.1 |
| Cerebrovascular disease         | 3,039              | 5,168 | 1.7  | 1.0    | 1.8 | 1.0 | 60.0 | 3,039            | 3,789,831.6 | 1,246.9 | 635.4  | 2,954.5 | 1.9  | 73,936.4 |
| Peripheral vascular disease     | 1,297              | 2,546 | 2.0  | 1.0    | 1.8 | 1.0 | 18.0 | 1,297            | 2,754,429.7 | 2,123.9 | 707.7  | 4,066.0 | 2.9  | 42,478.0 |
| Arrhythmias                     | 1,069              | 1,961 | 1.8  | 1.0    | 1.6 | 1.0 | 15.0 | 1,069            | 1,349,792.8 | 1,262.7 | 472.2  | 4,529.7 | 9.6  | 83,431.1 |
| Congestive heart failure        | 748                | 1,377 | 1.8  | 1.0    | 1.7 | 1.0 | 19.0 | 748              | 859,301.4   | 1,148.8 | 459.3  | 2,429.7 | 4.8  | 34,662.2 |
| Venous thromboembolism          | 412                | 784   | 1.9  | 1.0    | 1.7 | 1.0 | 13.0 | 412              | 433,285.2   | 1,051.7 | 490.4  | 2,151.7 | 6.7  | 25,539.2 |
| Pulmonary embolism              | 216                | 488   | 2.3  | 1.0    | 2.1 | 1.0 | 13.0 | 216              | 401,232.1   | 1,857.4 | 710.5  | 3,713.4 | 26.3 | 30,731.6 |

|                                 |       |       |     |     |     |     |      |       |             |         |         |          |         |           |
|---------------------------------|-------|-------|-----|-----|-----|-----|------|-------|-------------|---------|---------|----------|---------|-----------|
| Hypertension                    | 13    | 21    | 1.6 | 1.0 | 0.8 | 1.0 | 3.0  | 13    | 5,793.8     | 445.5   | 166.5   | 600.5    | 40.7    | 2,204.8   |
| Intestinal ischemia             | 6     | 7     | 1.2 | 1.0 | 0.4 | 1.0 | 2.0  | 6     | 13,767.5    | 2,294.7 | 1,255.5 | 3,179.4  | 20.6    | 8,687.6   |
| <i>Consumables</i>              |       |       |     |     |     |     |      |       |             |         |         |          |         |           |
| Myocardial ischemia/ infarction | 255   | 317   | 1.2 | 1.0 | 1.7 | 1.0 | 27.0 | 255   | 880,364.1   | 3,452.6 | 940.2   | 4,986.1  | 0.0     | 31,880.9  |
| Cerebrovascular disease         | 136   | 162   | 1.2 | 1.0 | 0.5 | 1.0 | 4.0  | 136   | 392,597.1   | 2,886.6 | 40.2    | 16,850.2 | 0.5     | 185,118.7 |
| Peripheral vascular disease     | 194   | 230   | 1.2 | 1.0 | 0.6 | 1.0 | 5.0  | 194   | 510,213.9   | 2,630.1 | 1,987.6 | 4,634.4  | 0.5     | 38,210.5  |
| Arrhythmias                     | 79    | 93    | 1.2 | 1.0 | 0.5 | 1.0 | 3.0  | 79    | 159,833.5   | 2,023.4 | 161.7   | 4,628.2  | 1.4     | 25,538.3  |
| Congestive heart failure        | 59    | 68    | 1.2 | 1.0 | 0.4 | 1.0 | 3.0  | 59    | 52,747.8    | 894.3   | 139.7   | 1,839.2  | 3.8     | 8,922.5   |
| Venous thromboembolism          | 34    | 39    | 1.1 | 1.0 | 0.4 | 1.0 | 3.0  | 34    | 32,795.2    | 964.6   | 47.8    | 1,905.7  | 0.5     | 6,216.3   |
| Pulmonary embolism              | 19    | 21    | 1.1 | 1.0 | 0.5 | 1.0 | 3.0  | 19    | 33,630.1    | 1,769.9 | 191.4   | 2,878.5  | 1.9     | 7,600.0   |
| Hypertension                    | 1     | 1     | 1.0 | 1.0 |     | 1.0 | 1.0  | 1     | 22.0        | 22.0    | 22.0    | 0.0      | 22.0    | 22.0      |
| Intestinal ischemia             | 1     | 1     | 1.0 | 1.0 |     | 1.0 | 1.0  | 1     | 1,546.9     | 1,546.9 | 1,546.9 | 0.0      | 1,546.9 | 1,546.9   |
| <i>Services</i>                 |       |       |     |     |     |     |      |       |             |         |         |          |         |           |
| Myocardial ischemia/ infarction | 3,599 | 6,242 | 1.7 | 1.0 | 1.6 | 1.0 | 16.0 | 3,599 | 5,756,301.0 | 1,598.9 | 271.7   | 10,059.2 | 2.1     | 343,284.6 |
| Cerebrovascular disease         | 3,159 | 5,213 | 1.7 | 1.0 | 1.7 | 1.0 | 22.0 | 3,159 | 5,703,977.8 | 1,805.8 | 380.4   | 17,094.1 | 10.5    | 872,203.0 |
| Peripheral vascular disease     | 1,497 | 2,938 | 2.0 | 1.0 | 1.7 | 1.0 | 17.0 | 1,497 | 3,142,289.9 | 2,098.4 | 587.3   | 6,017.1  | 2.1     | 83,071.2  |
| Arrhythmias                     | 1,088 | 1,869 | 1.7 | 1.0 | 1.6 | 1.0 | 12.0 | 1,088 | 2,613,940.0 | 2,403.5 | 472.3   | 13,513.9 | 20.9    | 354,802.6 |
| Congestive heart failure        | 721   | 1,225 | 1.7 | 1.0 | 1.7 | 1.0 | 17.0 | 721   | 1,813,810.7 | 2,516.4 | 457.7   | 8,086.2  | 20.9    | 94,789.9  |
| Venous thromboembolism          | 382   | 672   | 1.8 | 1.0 | 1.6 | 1.0 | 14.0 | 382   | 982,274.9   | 2,570.7 | 597.7   | 11,896.3 | 2.1     | 169,634.9 |
| Pulmonary embolism              | 196   | 374   | 1.9 | 1.0 | 1.6 | 1.0 | 9.0  | 196   | 1,314,911.0 | 6,708.9 | 760.8   | 31,389.7 | 52.3    | 321,694.9 |
| Hypertension                    | 13    | 15    | 1.2 | 1.0 | 0.4 | 1.0 | 2.0  | 13    | 18,371.1    | 1,412.8 | 169.3   | 4,157.0  | 46.0    | 15,215.2  |

|                                |    |    |     |     |     |     |     |    |           |          |         |          |         |          |
|--------------------------------|----|----|-----|-----|-----|-----|-----|----|-----------|----------|---------|----------|---------|----------|
| Intestinal ischemia            | 5  | 6  | 1.2 | 1.0 | 0.4 | 1.0 | 2.0 | 5  | 30,495.2  | 6,098.6  | 7,335.9 | 5,507.2  | 83.6    | 12,184.7 |
| <i><b>DRG</b></i>              |    |    |     |     |     |     |     |    |           |          |         |          |         |          |
| Myocardial ischemia/infarction | 17 | 19 | 1.1 | 1.0 | 0.3 | 1.0 | 2.0 | 17 | 152,923.4 | 8,995.7  | 4,748.8 | 12,538.3 | 0.0     | 49,134.9 |
| Cerebrovascular disease        | 11 | 13 | 1.2 | 1.0 | 0.4 | 1.0 | 2.0 | 11 | 44,399.0  | 4,036.4  | 3,978.0 | 2,754.1  | 0.0     | 9,671.3  |
| Peripheral vascular disease    | 3  | 3  | 1.0 | 1.0 | 0.0 | 1.0 | 1.0 | 3  | 30,625.4  | 10,208.6 | 7,139.7 | 8,066.5  | 4,126.8 | 19,358.9 |
| Arrhythmias                    | 5  | 5  | 1.0 | 1.0 | 0.0 | 1.0 | 1.0 | 5  | 100,508.6 | 20,101.9 | 5,893.3 | 35,884.7 | 0.0     | 84,137.8 |
| Congestive heart failure       | 6  | 7  | 1.2 | 1.0 | 0.4 | 1.0 | 2.0 | 6  | 128,333.5 | 21,389.0 | 7,599.0 | 33,986.6 | 2,049.8 | 89,921.5 |
| Venous thromboembolism         | 1  | 1  | 1.0 | 1.0 |     | 1.0 | 1.0 | 1  | 2,707.7   | 2,707.7  | 2,707.7 | 0.0      | 2,707.7 | 2,707.7  |
| Pulmonary embolism             | 2  | 2  | 1.0 | 1.0 | 0.0 | 1.0 | 1.0 | 2  | 7,655.0   | 3,827.3  | 3,827.3 | 5,412.9  | 0.0     | 7,655.0  |
| Hypertension                   | 3  | 3  | 1.0 | 1.0 | 0.0 | 1.0 | 1.0 | 3  | 10,451.2  | 3,483.7  | 3,249.3 | 442.6    | 3,207.7 | 3,994.3  |
| Intestinal ischemia            | -  | -  | -   | -   | -   | -   | -   | -  | -         | -        | -       | -        | -       | -        |

Abbreviations: DRG, diagnosis related group; Max, maximum; Min, minimum; Std, standard deviation, USD, United States Dollars.

Note: Excluded the claims having claim amount less than equal to 0 USD.

Net Cost = Insurance Paid Amount

Implied PPP conversion rate (National currency per international dollar): <https://www.imf.org/external/datamapper/PPPEX@WEO/OEMDC/ARE>

## FIGURES

**Figure S1** Gross cost comparison between all-cause cost and disease-specific cost.

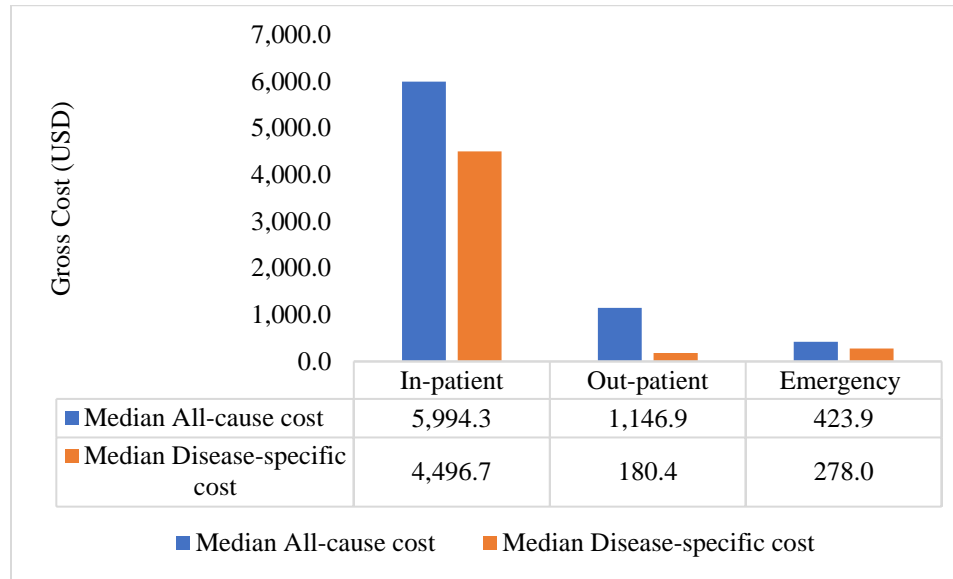

Abbreviations: USD, United States Dollar

**Figure S2** Net cost comparison between all-cause cost and disease-specific cost.

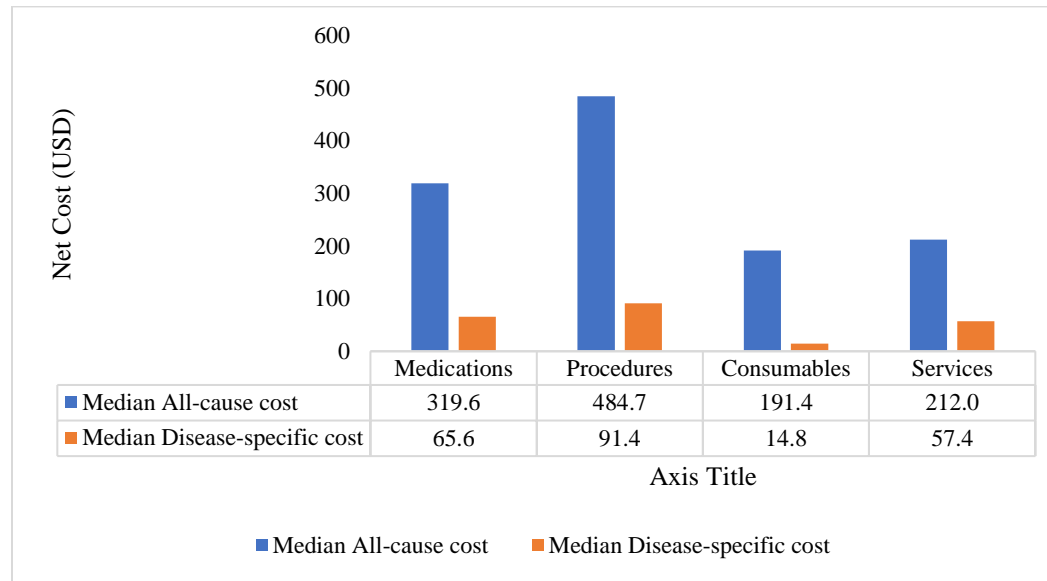

Abbreviations: USD, United States Dollar
